# Supplementary material for: Creating tissue on chip constructs in microtitre plates for drug discovery
Source: Royal Society of Chemistry journal article supplement (doi:10.1039/c8ra00849c), 2018-01-01
Supplement: c8ra00849c1.pdf [file c8ra00849c1.pdf]

## Creating Tissue on Chip Constructs in Microtitre Plates for Drug Discovery

N.P. Macdonald, A. Menachery, J. Reboud and J.M. Cooper

### Supplementary Information

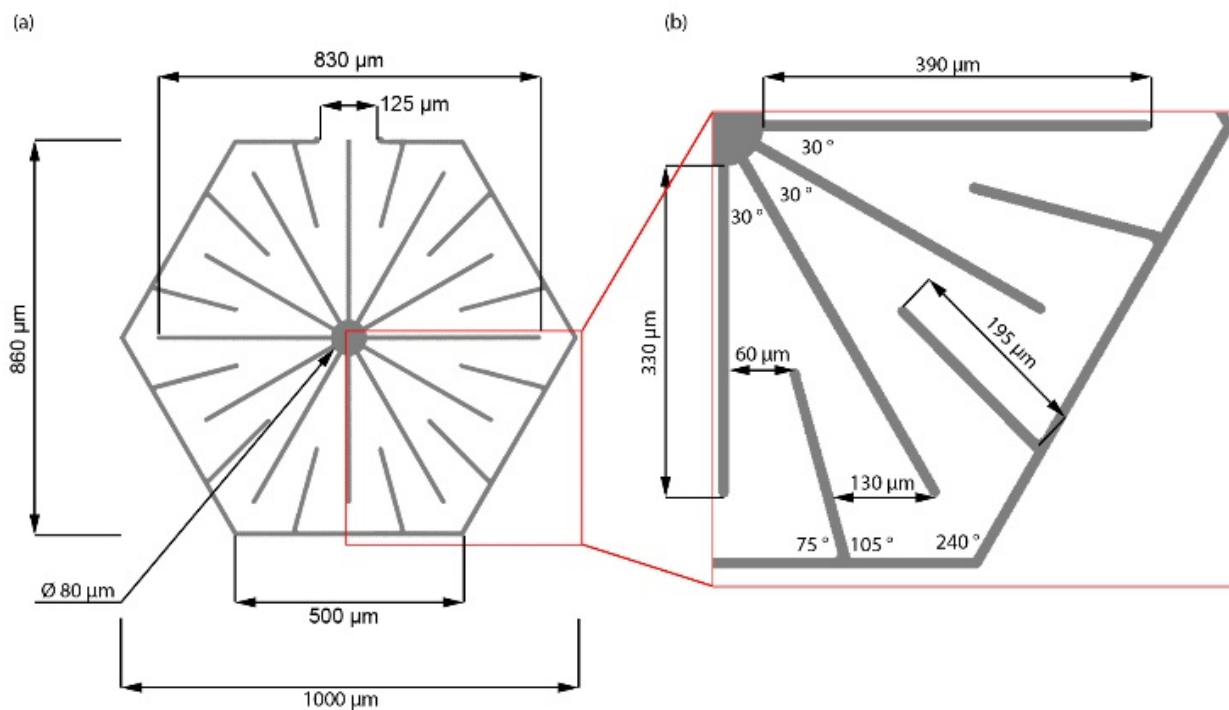

Figure S1. Electrode design

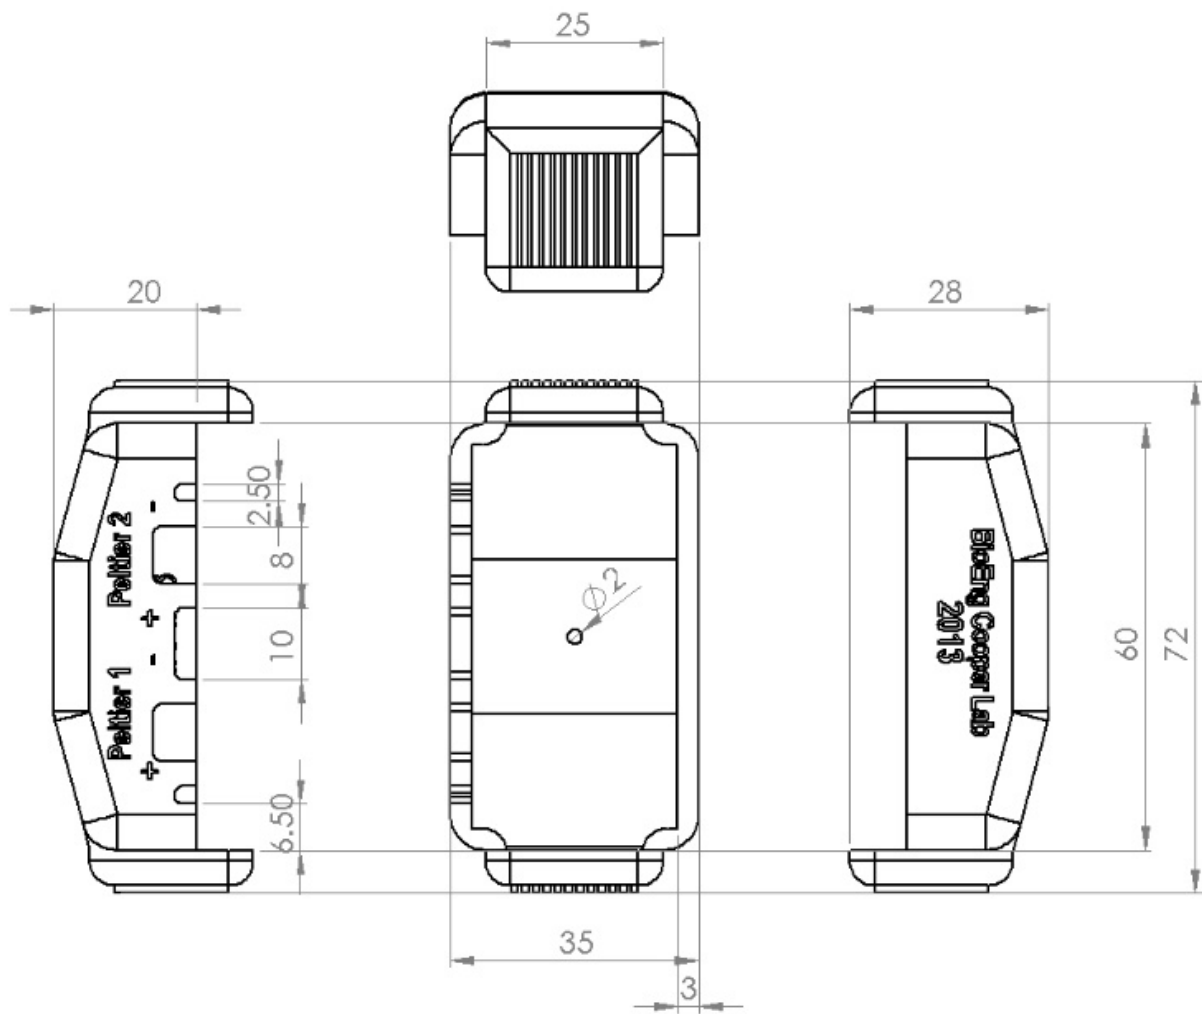

Figure S2. 3D printed cover design

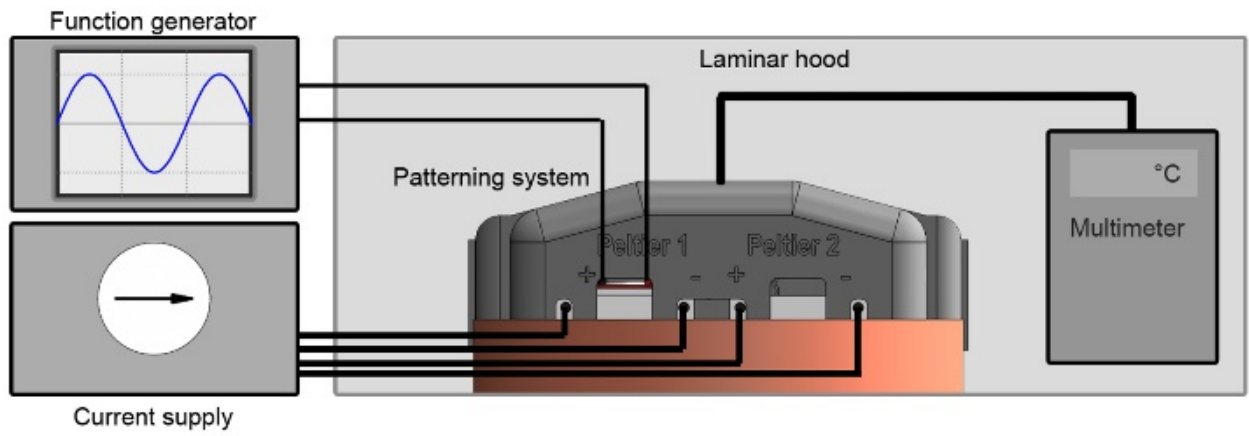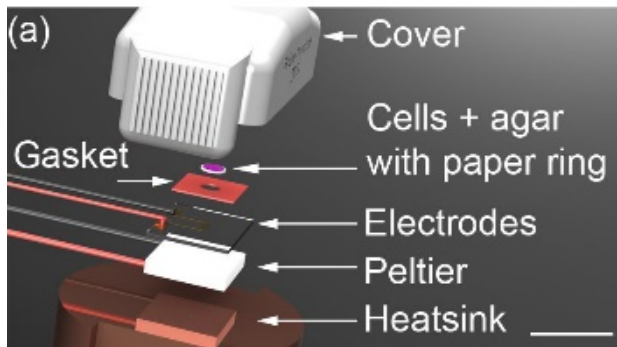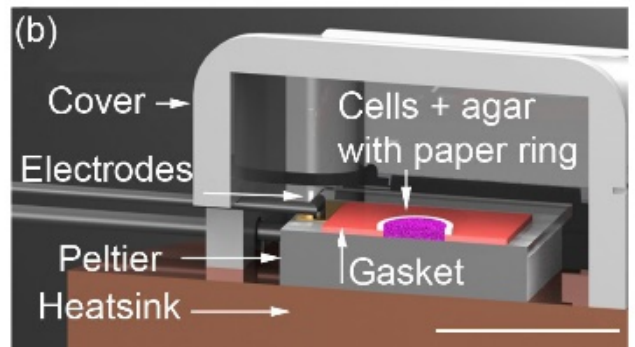

Figure S3 – systems view.
